# Supplementary material for: Calculation of protein–ligand binding affinities based on a fragment quantum mechanical method
Source: Royal Society of Chemistry journal article supplement (doi:10.1039/c5ra20185c), 2015-01-01
Supplement: c5ra20185c1.pdf [file c5ra20185c1.pdf]

Supplementary materials for

## **Calculation of Protein-Ligand Binding Affinities Based on Fragment Quantum Mechanical Method**

*Jinfeng Liu<sup>1</sup>, Xianwei Wang<sup>2</sup>, John Z.H. Zhang<sup>1,3,4</sup> and Xiao He<sup>1,3\*</sup>*

*<sup>1</sup>State Key Laboratory of Precision Spectroscopy, Institute of Theoretical and  
Computational Science, College of Chemistry and Molecular Engineering, East  
China Normal University, Shanghai, 200062, China*

*<sup>2</sup>Center for Optics & Optoelectronics Research, College of Science, Zhejiang  
University of Technology, Hangzhou, Zhejiang, 310023, China*

*<sup>3</sup>NYU-ECNU Center for Computational Chemistry at NYU Shanghai, Shanghai,  
200062, China*

*<sup>4</sup>Department of Chemistry, New York University, NY, NY 10003, US*

\* To whom correspondence should be addressed: [xiaohe@phy.ecnu.edu.cn](mailto:xiaohe@phy.ecnu.edu.cn)

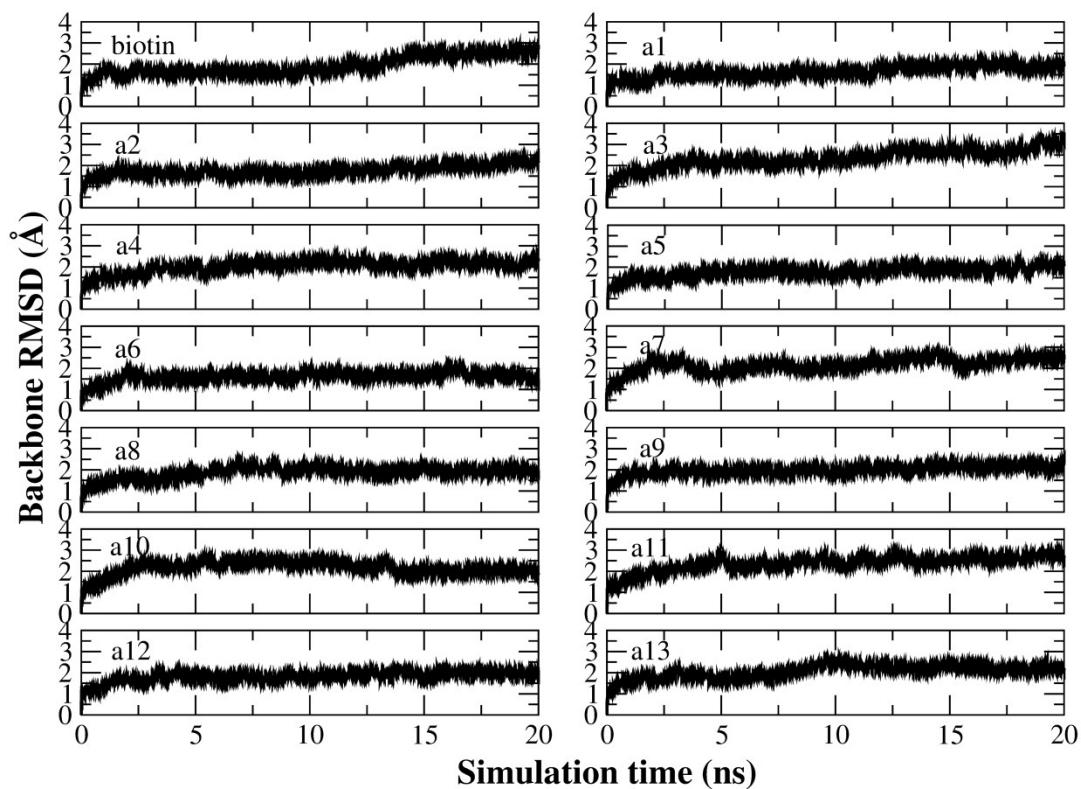

**Figure S1.** The backbone RMSD of 14 avidin-biotin (and biotin analogues) binding complexes as a function of simulation time.
